# Supplementary material for: Dopamine receptor antagonists as potential therapeutic agents for ADPKD
Source: PubMed Central journal article supplement (PMC6502331; doi:10.1371/journal.pone.0216220), 2019-05-06
Supplement: pone.0216220.s006.pdf [file pone.0216220.s006.pdf]

**S1 Table. Positive hit compounds.** Mechanism of action listed are taken from the Prestwick library annotation except the ones in green, which are based on literature. Also fraction nuclear, SEM and P values are tabulated (for details see Methods).

|                   | Chemical name                  | Mechanism of action                                                                                   | Fraction Nuclear | SEM   | P      |
|-------------------|--------------------------------|-------------------------------------------------------------------------------------------------------|------------------|-------|--------|
| 1uM positive hits | Cisapride                      | 5-HT antagonist                                                                                       | 0.240            | 0.023 | 0.0002 |
|                   | Loxapine succinate             | Dopamine antagonist                                                                                   | 0.270            | 0.036 | 0.0036 |
|                   | Oxybutynin chloride            | Anticholinergic                                                                                       | 0.277            | 0.017 | 0.0001 |
|                   | Cyproheptadine hydrochloride   | 5-HT antagonist; Histamine antagonist                                                                 | 0.278            | 0.026 | 0.0011 |
|                   | Domperidone                    | Dopamine Antagonists                                                                                  | 0.281            | 0.041 | 0.0083 |
|                   | Pimozide                       | Dopamine antagonist ?                                                                                 | 0.309            | 0.015 | 0.0002 |
|                   | Pizotifen malate               | Serotonin antagonist                                                                                  | 0.315            | 0.022 | 0.0013 |
|                   | Pimethixene maleate            | Anticholinergic, Serotonin antagonist, Bradykinin antagonist                                          | 0.323            | 0.032 | 0.0084 |
|                   | Tridihexethyl chloride         | Anticholinergic                                                                                       | 0.333            | 0.013 | 0.0003 |
|                   | Deptropine citrate             | Antihistamine, anticholinergic                                                                        | 0.338            | 0.040 | 0.0313 |
|                   | Amityptiline hydrochloride     | Alpha 1 antagonist, anticholinergic, histaminic antagonist, serotonin uptake inhibitor, noradrenaline | 0.346            | 0.023 | 0.0048 |
|                   | Nisoldipine                    | Calcium channel blocker                                                                               | 0.347            | 0.012 | 0.0002 |
|                   | Folic acid                     | Member of Vitamin B family                                                                            | 0.348            | 0.021 | 0.0035 |
|                   | Cefamandole sodium salt        | Bacterial transpeptidase inhibitor                                                                    | 0.349            | 0.013 | 0.0005 |
|                   | Carbadox                       | Antibiotic                                                                                            | 0.350            | 0.011 | 0.0002 |
|                   | Atovaquone                     | Inhibits parasitic electron transport chain                                                           | 0.351            | 0.005 | 0.0000 |
|                   | Brinzolamide                   | Carbonic anhydrase inhibitor                                                                          | 0.352            | 0.026 | 0.0099 |
|                   | Diphemanil methylsulfate       | Anticholinergic                                                                                       | 0.353            | 0.012 | 0.0003 |
|                   | Etanidazole                    | DNA damage                                                                                            | 0.353            | 0.017 | 0.0016 |
|                   | Hycanthone                     | DNA intercalating agent                                                                               | 0.354            | 0.016 | 0.0014 |
|                   | Bacampicillin hydrochloride    | Bacterial transpeptidase inhibitor                                                                    | 0.355            | 0.012 | 0.0004 |
|                   | Clebopride maleate             | Dopamine antagonist, stimulate the intramural cholinergic system                                      | 0.355            | 0.024 | 0.0080 |
|                   | Erlotinib                      | Tyrosine kinase inhibitor                                                                             | 0.356            | 0.019 | 0.0035 |
|                   | Tetrahydrozoline hydrochloride | Adrenergic agonist                                                                                    | 0.357            | 0.022 | 0.0066 |
|                   | Acemetacin                     | Cyclooxygenase inhibitor                                                                              | 0.358            | 0.024 | 0.0087 |
|                   | Propylthiouracil               | Antimetabolite                                                                                        | 0.359            | 0.027 | 0.0150 |
|                   | Beta-Escin                     | Induce nitric oxide synthesis, serotonin antagonist, histamine antagonist                             | 0.359            | 0.027 | 0.0160 |
|                   | Methyldopate hydrochloride     | Adrenergic receptor agonist                                                                           | 0.359            | 0.027 | 0.0153 |
|                   | Lofexidine                     | alpha2-adrenergic receptor agonist                                                                    | 0.360            | 0.025 | 0.0116 |
|                   | Fluoxetine hydrochloride       | 5-HT uptake inhibitor                                                                                 | 0.360            | 0.012 | 0.0006 |

|                     |                              |                                                                                    |       |       |        |
|---------------------|------------------------------|------------------------------------------------------------------------------------|-------|-------|--------|
|                     | Fluspirilen                  | Probable weak calcium channel antagonist                                           | 0.361 | 0.027 | 0.0179 |
|                     | Ceforanide                   | Antibiotic                                                                         | 0.361 | 0.021 | 0.0061 |
|                     | Flunisolide                  | Glucocorticoid receptor agonist, anti-inflammatory                                 | 0.363 | 0.016 | 0.0024 |
| 100nM positive hits | Etofenamate                  | cyclooxygenase inhibitor                                                           | 0.319 | 0.026 | 0.0048 |
|                     | Doxorubicin hydrochloride    | DNA intercalant                                                                    | 0.329 | 0.027 | 0.0079 |
|                     | Trioxsalen                   | Photosensitization causing programmed cell death                                   | 0.331 | 0.018 | 0.0013 |
|                     | Tiabendazole                 | Microtubule inhibitor                                                              | 0.332 | 0.018 | 0.0015 |
|                     | Tizanidine HCl               | Noradrenergic receptor agonist                                                     | 0.333 | 0.012 | 0.0003 |
|                     | Mercaptopurine               | inhibits purine nucleotide synthesis and metabolism                                | 0.337 | 0.031 | 0.0167 |
|                     | Probenecid                   | Uric acid uptake inhibitor                                                         | 0.337 | 0.015 | 0.0008 |
|                     | Florfenicol                  | Protein synthesis inhibitor                                                        | 0.338 | 0.031 | 0.0174 |
|                     | Prazosin hydrochloride       | Adrenergic receptor antagonist                                                     | 0.339 | 0.022 | 0.0051 |
|                     | Stavudine                    | nucleoside analog reverse transcriptase inhibitor                                  | 0.340 | 0.010 | 0.0001 |
|                     | Abacavir Sulfate             | Nucleoside analog reverse transcriptase inhibitor                                  | 0.342 | 0.026 | 0.0109 |
|                     | Quipazine dimaleate salt     | 5-HT agonist; '5-HT3 ligand                                                        | 0.342 | 0.034 | 0.0282 |
|                     | Tolazamide                   | ATP-sensitive K+ ion channels blocker                                              | 0.342 | 0.047 | 0.0779 |
|                     | Imipenem                     | Bacterial transpeptidase inhibitor                                                 | 0.343 | 0.019 | 0.0031 |
|                     | Atropine sulfate monohydrate | Muscarinic antagonist                                                              | 0.343 | 0.020 | 0.0032 |
|                     | Carbimazole                  | Iodine oxidizing inhibitor                                                         | 0.343 | 0.011 | 0.0003 |
|                     | Colistin sulfate             | Performs membrane ionophores                                                       | 0.345 | 0.012 | 0.0004 |
|                     | Acarbose                     | inhibits enzymes (glycoside hydrolases) needed to digest carbohydrates             | 0.345 | 0.024 | 0.0077 |
|                     | Meclocycline sulfosalicylate | Ribosomal protein synthesis inhibitor                                              | 0.346 | 0.025 | 0.0101 |
|                     | (S)-(-)-Atenolol             | Adrenergic receptor antagonist                                                     | 0.347 | 0.021 | 0.0052 |
|                     | Rimantadine Hydrochloride    | Antiviral                                                                          | 0.347 | 0.032 | 0.0262 |
|                     | Carbadox                     | Antibacterial                                                                      | 0.347 | 0.029 | 0.0194 |
|                     | Valacyclovir hydrochloride   | inhibitor of viral DNA polymerase                                                  | 0.348 | 0.025 | 0.0113 |
|                     | Tomoxetine hydrochloride     | norepinephrine reuptake inhibitor                                                  | 0.348 | 0.014 | 0.0010 |
|                     | Amiodarone hydrochloride     | Na+ channel blocker; 'K+ channel blocker; 'Non-competitive beta-adrenergic blocker | 0.349 | 0.021 | 0.0053 |
|                     | Prenylamine lactate          | Calcium channel activator                                                          | 0.350 | 0.006 | 0.0000 |
|                     | Probucol                     | Anti-hyperlipidemic                                                                | 0.351 | 0.027 | 0.0160 |
|                     | Proadifen hydrochloride      | Cytochrome P450 mono-oxygenases inhibitor; 'Na+ channel blocker                    | 0.352 | 0.023 | 0.0100 |
|                     | Buflomedil hydrochloride     | Vasodilation, adrenoceptor antagonist                                              | 0.353 | 0.024 | 0.0124 |
|                     | Omeprazole                   | Non competitive ATPase H+ pump inhibitor                                           | 0.354 | 0.019 | 0.0045 |
|                     | Ethaverine hydrochloride     | Improve cochlear microcirculation                                                  | 0.354 | 0.020 | 0.0055 |

|  |                               |                                                             |       |       |        |
|--|-------------------------------|-------------------------------------------------------------|-------|-------|--------|
|  | SR-95639A dihydrochloride     | M1 agonist receptor                                         | 0.354 | 0.012 | 0.0006 |
|  | Raclopride                    | selective dopamine D1/D2 receptors antagonist               | 0.355 | 0.019 | 0.0053 |
|  | Pentobarbital                 | Inhibition of calcium channel                               | 0.355 | 0.026 | 0.0175 |
|  | Canrenoic acid potassium salt | Detergent                                                   | 0.356 | 0.013 | 0.0008 |
|  | Chlorprothixene hydrochloride | D2 dopamine receptor antagonist, GABAA receptors antagonist | 0.356 | 0.012 | 0.0007 |
|  | Tiaprofenic acid              | Cyclooxygenase inhibitor                                    | 0.356 | 0.022 | 0.0091 |
