# Supplementary material for: Dopamine receptor antagonists as potential therapeutic agents for ADPKD
Source: PubMed Central journal article supplement (PMC6502331; doi:10.1371/journal.pone.0216220), 2019-05-06
Supplement: pone.0216220.s007.pdf [file pone.0216220.s007.pdf]

**S2 Table. Negative hit compounds.** Mechanism of action listed are taken from the Prestwick library annotation except the ones in green, which are based on literature.

|                     | Chemical name                                     | Mechanism of action                                                                 | Fraction Nuclear | SEM    | P      |
|---------------------|---------------------------------------------------|-------------------------------------------------------------------------------------|------------------|--------|--------|
| 1µM negative hits   | (+)-Isoproterenol (+)-bitartrate salt             | Adrenergic receptor agonist                                                         | 0.550            | 0.038  | 0.0547 |
|                     | Alprostadil                                       | Prostaglandin receptor agonist                                                      | 0.553            | 0.035  | 0.0386 |
|                     | Ritodrine hydrochloride                           | Beta2 agonist                                                                       | 0.553            | 0.029  | 0.0209 |
|                     | Pridinol methanesulfonate salt                    | Anticholinergic                                                                     | 0.556            | 0.030  | 0.0205 |
|                     | Fenoterol hydrobromide                            | Beta adrenergic agonist                                                             | 0.559            | 0.039  | 0.0446 |
|                     | Benzethonium chloride                             | Detergent                                                                           | 0.562            | 0.037  | 0.0350 |
|                     | Acetohexamide                                     | Blocking of ATP-sensitive K <sup>+</sup> channel;<br>Stimulation of insulin release | 0.564            | 0.021  | 0.0037 |
|                     | Nylidrin                                          | sympathomimetic beta-adrenergic agonist                                             | 0.566            | 0.026  | 0.0077 |
|                     | Levonordefrin                                     | Adrenergic receptor agonist                                                         | 0.569            | 0.008  | 0.0000 |
|                     | Metaproterenol sulfate<br>orciprenaline sulfate   | Beta-adrenergic agonist                                                             | 0.569            | 0.034  | 0.0217 |
|                     | Bosentan                                          | endothelin-1 inhibition                                                             | 0.576            | 0.029  | 0.0085 |
|                     | Trazodone hydrochloride                           | 5-HT uptake inhibitor                                                               | 0.577            | 0.019  | 0.0015 |
|                     | Salbutamol                                        | Beta adrenergic agonist                                                             | 0.577            | 0.008  | 0.0000 |
|                     | Dipivefrin hydrochloride                          | Prodrug, epinephrine produced is an adrenergic agonist                              | 0.586            | 0.012  | 0.0001 |
|                     | Ebselen                                           | Cyclooxygenase inhibitor                                                            | 0.590            | 0.023  | 0.0023 |
|                     | Tulobuterol                                       | beta-2-adrenergic receptor agonist                                                  | 0.599            | 0.022  | 0.0012 |
|                     | Terbutaline hemisulfate                           | Beta-2 adrenergic agonist                                                           | 0.610            | 0.023  | 0.0012 |
| Racepinephrine HCl  | non-selective agonist of all adrenergic receptors | 0.616                                                                               | 0.013            | 0.0001 |        |
| Formoterol fumarate | β <sub>2</sub> -agonist                           | 0.617                                                                               | 0.018            | 0.0003 |        |
| 100nM negative hits | Levonordefrin                                     | Adrenergic receptor agonist                                                         | 0.536            | 0.016  | 0.0023 |
|                     | Fenoterol hydrobromide                            | Beta adrenergic agonist                                                             | 0.543            | 0.020  | 0.0050 |
|                     | Benzethonium chloride                             | Detergent                                                                           | 0.552            | 0.021  | 0.0039 |
|                     | Dipivefrin hydrochloride                          | Prodrug, epinephrine produced is an adrenergic agonist                              | 0.555            | 0.023  | 0.0051 |
|                     | Salbutamol                                        | Beta adrenergic agonist                                                             | 0.570            | 0.014  | 0.0003 |
|                     | Isoetharine mesylate salt                         | Beta adrenergic agonist                                                             | 0.577            | 0.022  | 0.0018 |
|                     | Bosentan                                          | endothelin-1 inhibition                                                             | 0.579            | 0.015  | 0.0003 |
|                     | Racepinephrine HCl                                | non-selective agonist of all adrenergic receptors                                   | 0.595            | 0.027  | 0.0026 |
