# Supplementary material for: Dopamine receptor antagonists as potential therapeutic agents for ADPKD
Source: PubMed Central journal article supplement (PMC6502331; doi:10.1371/journal.pone.0216220), 2019-05-06
Supplement: pone.0216220.s008.pdf [file pone.0216220.s008.pdf]

**S3 Table. Effect of Domperidone treatment on body weight (BW), kidney weight (KW) and number of glomerular cyst in long term treatment group. Measurements made in P43 mice.**

|                        | <b>WT</b> | <b><i>Pkd1</i><sup>-/-</sup> DMSO treated</b> | <b><i>Pkd1</i><sup>-/-</sup> Domperidone treated</b> |
|------------------------|-----------|-----------------------------------------------|------------------------------------------------------|
| <b>BW (gm)</b>         | 17 ± 4.04 | 8 ± 0                                         | 16 ± 3.51                                            |
| <b>KW/BW (%)</b>       | 0.2 ± 0   | 1.35 ± 0.49                                   | 1 ± 0.50                                             |
| <b>Glomerular cyst</b> | 0 ± 0     | 66 ± 2.82                                     | 21 ± 32.96                                           |
