# Supplementary material for: Dopamine receptor antagonists as potential therapeutic agents for ADPKD
Source: PubMed Central journal article supplement (PMC6502331; doi:10.1371/journal.pone.0216220), 2019-05-06

Full unedited gel for Fig 1

DMSO                      Loxapine                      Domperidone  
S100    NE                      S100    NE                      S100    NE

HDAC5-P

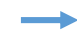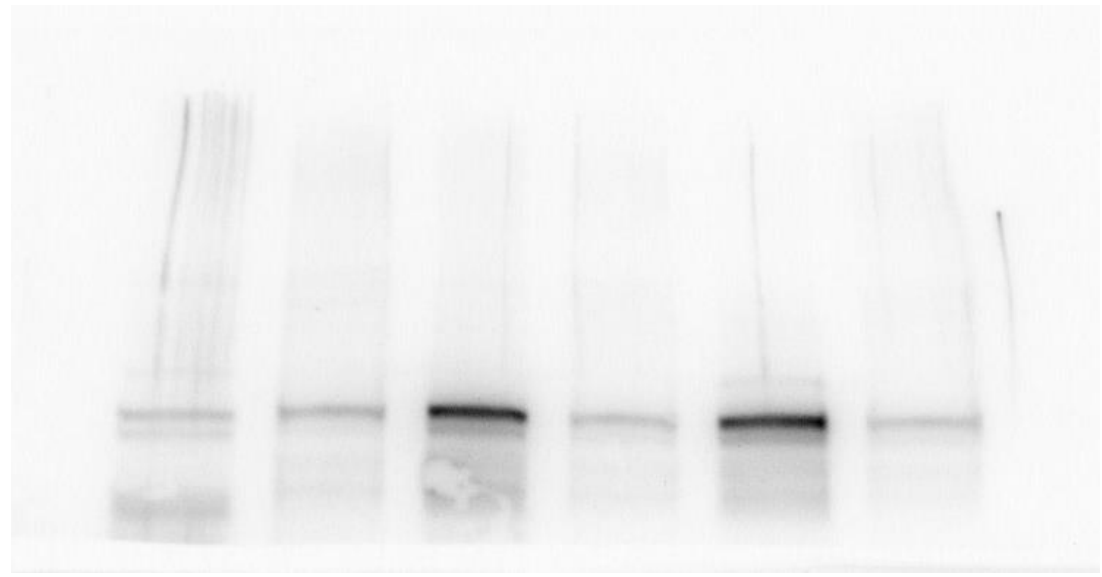

Lamin B1

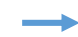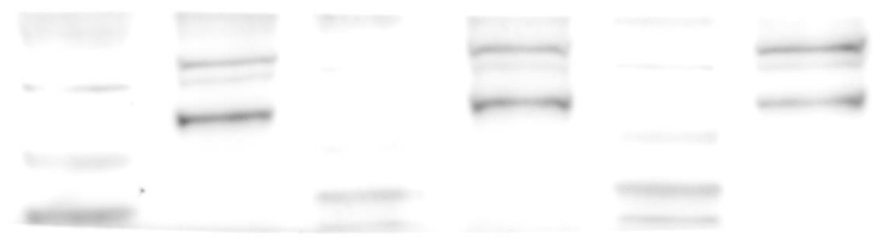

14-3-3

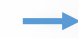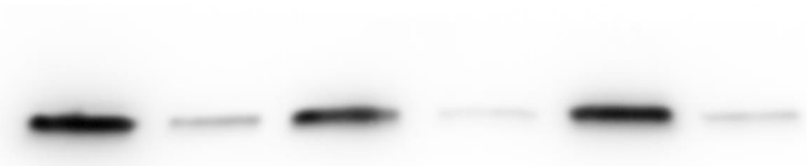

Supplement: pone.0216220.s010.pdf [file pone.0216220.s010.pdf]
