# Supplementary material for: Dopamine receptor antagonists as potential therapeutic agents for ADPKD
Source: PubMed Central journal article supplement (PMC6502331; doi:10.1371/journal.pone.0216220), 2019-05-06

Full unedited gel for Fig 2

Drd1a antibody

Ctrl    Drd1a  
RNAi   RNAi

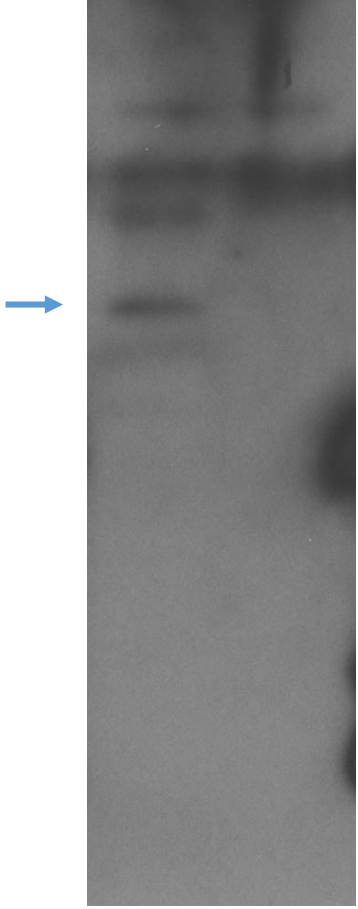

Drd2 antibody

Ctrl    Drd2  
RNAi   RNAi

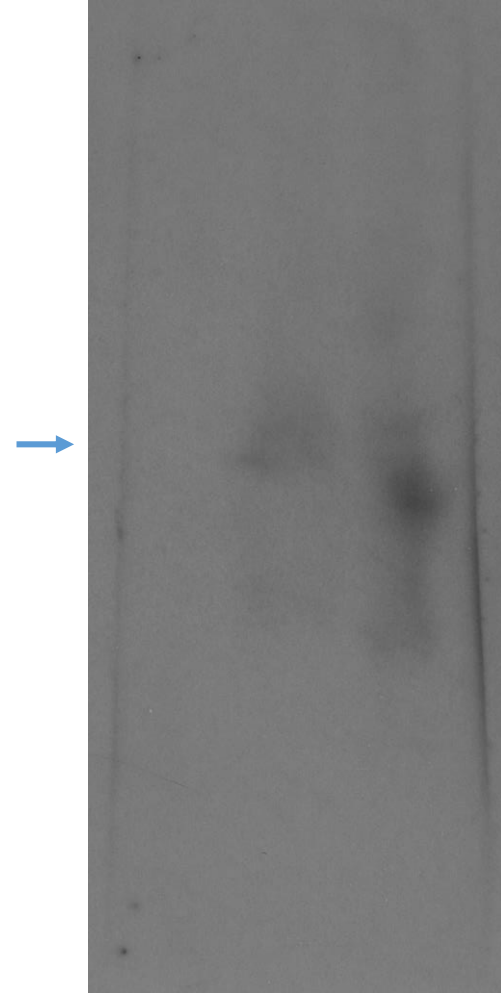

Drd1a antibody

Ctrl    Drd3  
RNAi   RNAi

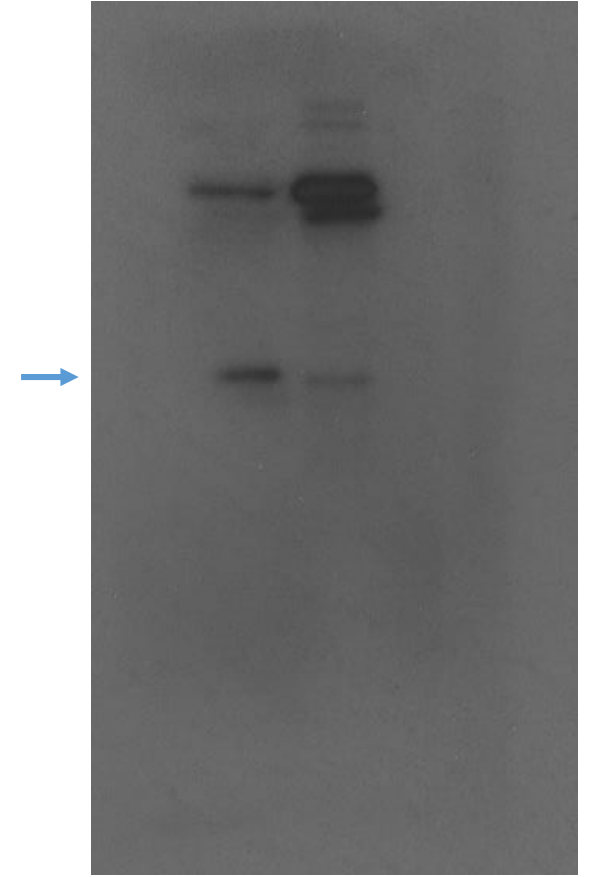

Ctrl  
RNAi

Drd1a  
RNAi

Ctrl  
RNAi

Drd2  
RNAi

Ctrl  
RNAi

Drd3  
RNAi

14-3-3 Ab

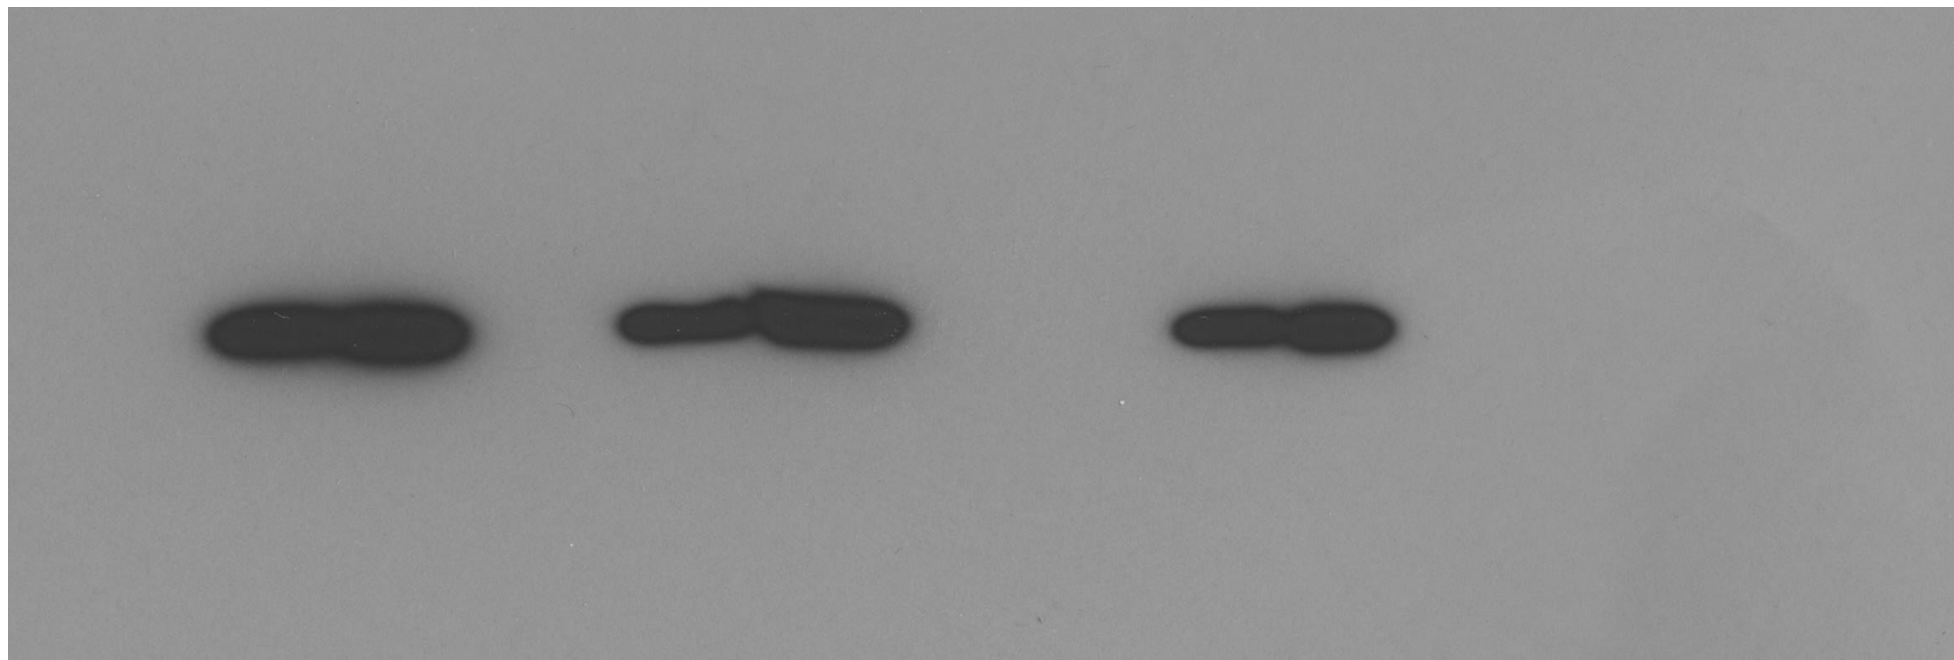

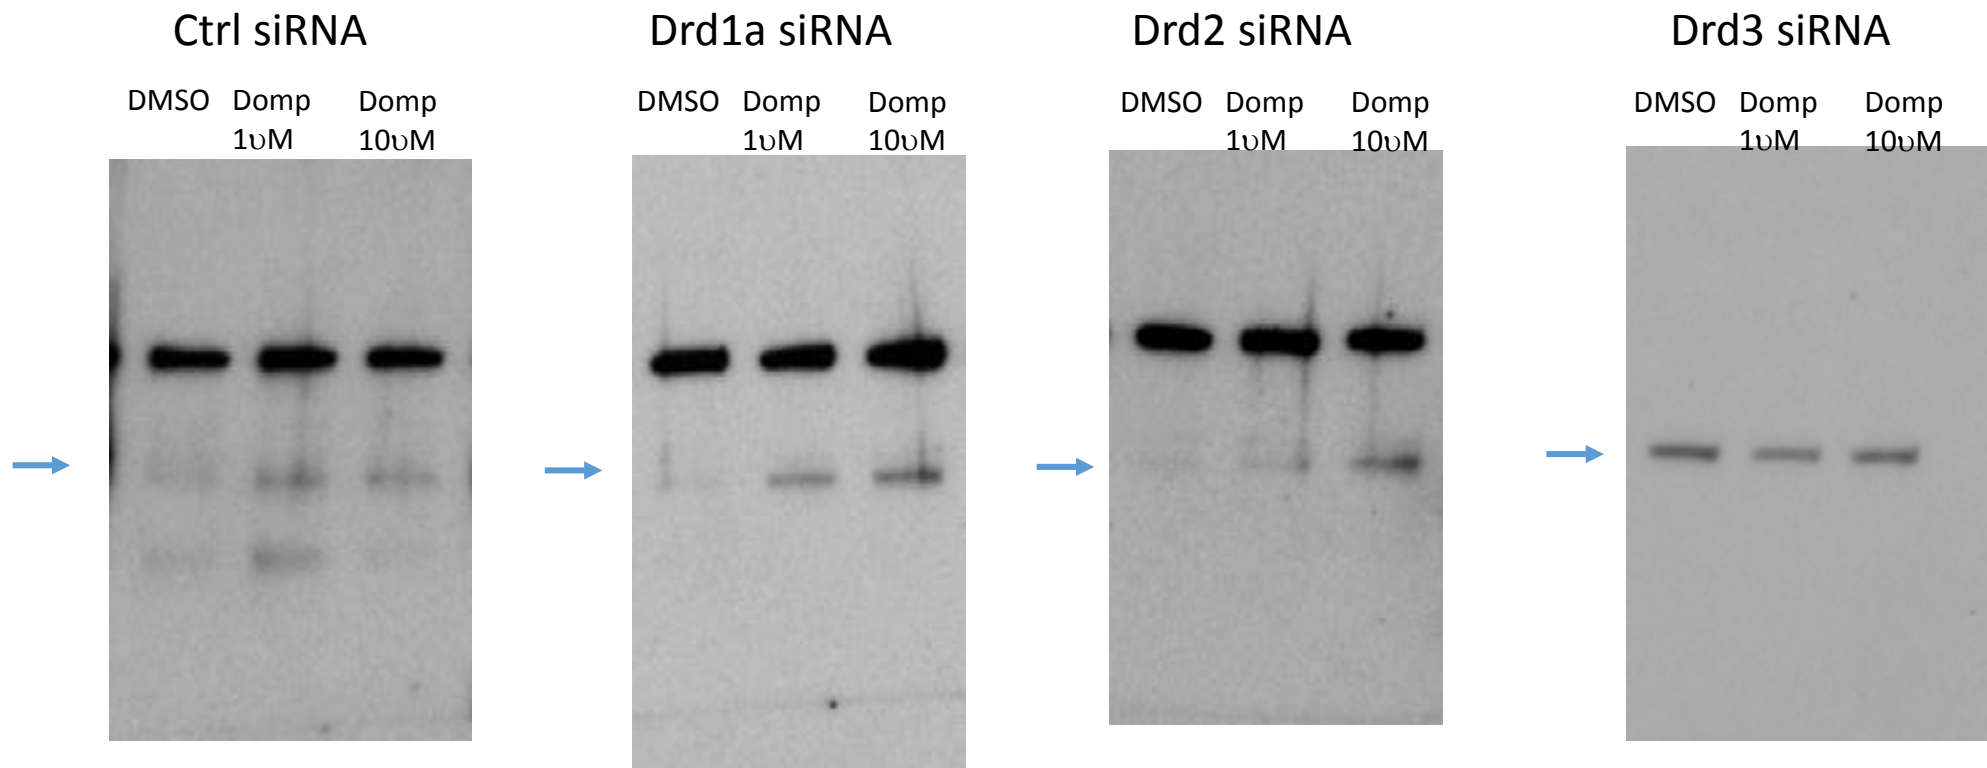

Ctrl siRNA

Drd1a siRNA

Drd2 siRNA

Drd3 siRNA

DMSO Domp Domp  
1uM 10uM

14-3-3

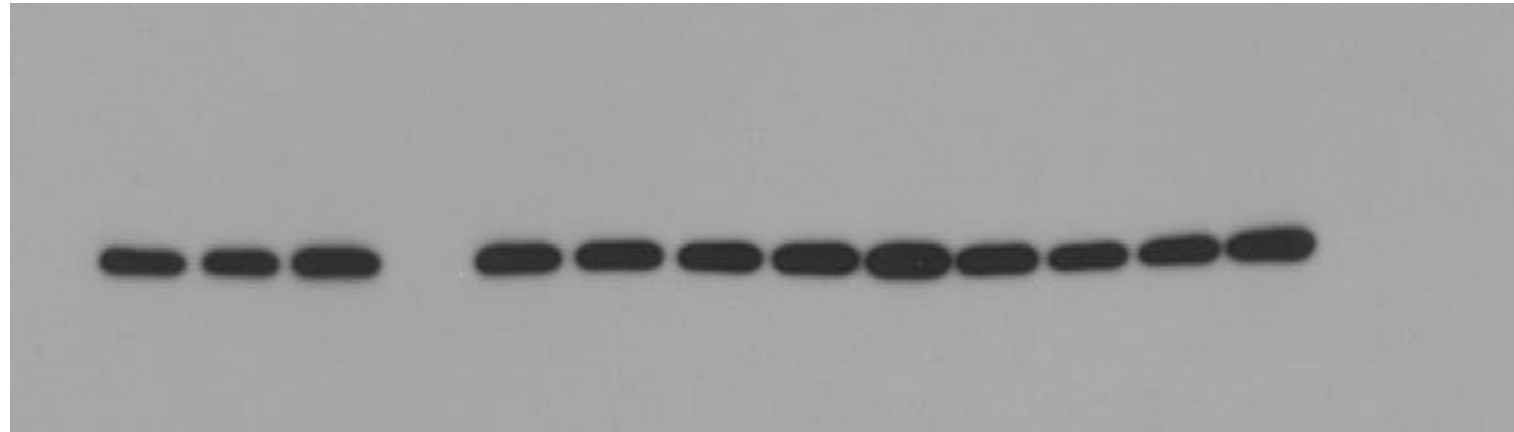

Supplement: pone.0216220.s011.pdf [file pone.0216220.s011.pdf]
