# Supplementary material for: Dopamine receptor antagonists as potential therapeutic agents for ADPKD
Source: PubMed Central journal article supplement (PMC6502331; doi:10.1371/journal.pone.0216220), 2019-05-06
Supplement: pone.0216220.s012.pdf [file pone.0216220.s012.pdf]

Data for Fig 1C

HDAC-GFP-PKD1 loxp/loxP

**DMSO**

Total number of cell

|           | Image 1 | Image 2 | Image 3 | Image 4 | Image 5 |
|-----------|---------|---------|---------|---------|---------|
| Nuclear   | 55      | 63      | 90      | 110     | 78      |
| Both      | 3       | 5       | 1       | 8       | 4       |
| Cytoplasm | 1       | 0       | 3       | 14      | 12      |

**Domperidone 10nM**

|           | Image 1 | Image 2 | Image 3 | Image 4 | Image 5 | Image 6 |
|-----------|---------|---------|---------|---------|---------|---------|
| Nuclear   | 32      | 70      | 61      | 67      | 49      | 57      |
| Both      | 11      | 26      | 11      | 20      | 14      | 19      |
| Cytoplasm | 21      | 12      | 4       | 7       | 34      | 19      |

**Domperidone 100nM**

|           | Image 1 | Image 2 | Image 3 | Image 4 | Image 5 | Image 6 |
|-----------|---------|---------|---------|---------|---------|---------|
| Nuclear   | 6       | 5       | 8       | 6       | 1       | 4       |
| Both      | 18      | 15      | 19      | 36      | 25      | 20      |
| Cytoplasm | 110     | 102     | 59      | 90      | 76      | 78      |

**Domperidone 1µM**

|           | Image 1 | Image 2 | Image 3 | Image 4 |
|-----------|---------|---------|---------|---------|
| Nuclear   | 3       | 3       | 1       | 6       |
| Both      | 9       | 7       | 3       | 7       |
| Cytoplasm | 84      | 141     | 100     | 143     |

**Loxapine**

Image 1 Image 2 Image 3 Image 4 Image 5

|           | Image 1 | Image 2 | Image 3 | Image 4 | Image 5 |
|-----------|---------|---------|---------|---------|---------|
| Nuclear   | 4       | 0       | 8       | 4       | 12      |
| Both      | 26      | 10      | 32      | 32      | 30      |
| Cytoplasm | 90      | 77      | 84      | 68      | 103     |

PKD1 null transiently transfected with HDAC5-GFP

**DMSO**

|           | Image 1 | Image 2 | Image 3 | Image 4 |
|-----------|---------|---------|---------|---------|
| Nuclear   | 98      | 122     | 109     | 120     |
| Cytoplasm | 4       | 8       | 12      | 7       |

**Domperidone**

|           | Image 1 | Image 2 | Image 3 | Image 4 |
|-----------|---------|---------|---------|---------|
| Nuclear   | 7       | 25      | 17      | 10      |
| Cytoplasm | 93      | 140     | 66      | 78      |

**Loxapine**

|           | <b>Image 1</b> | <b>Image 2</b> | <b>Image 3</b> | <b>Image 4</b> |
|-----------|----------------|----------------|----------------|----------------|
| Nuclear   | 0              | 6              | 10             | 15             |
| Cytoplasm | 30             | 150            | 62             | 105            |

Data for Fig 2B

HDAC-GFP-PKD1 loxp/loxP

**DMSO**

Total number of cell

|           | Image 1 | Image 2 | Image 3 | Image 4 | Image 5 |
|-----------|---------|---------|---------|---------|---------|
| Nuclear   | 104     | 90      | 111     | 81      | 124     |
| Both      | 20      | 17      | 6       | 7       | 8       |
| Cytoplasm | 3       | 7       | 10      | 0       | 4       |

**Spiperone**

|           | Image 1 | Image 2 | Image 3 |
|-----------|---------|---------|---------|
| Nuclear   | 5       | 7       | 5       |
| Both      | 6       | 5       | 10      |
| Cytoplasm | 129     | 98      | 119     |

**Haloperidol**

|           | Image 1 | Image 2 | Image 3 |
|-----------|---------|---------|---------|
| Nuclear   | 11      | 6       | 20      |
| Both      | 3       | 10      | 10      |
| Cytoplasm | 115     | 121     | 59      |

**Raclopride**

|           | Image 1 | Image 2 | Image 3 | Image 4 | Image 5 | Image 6 | Image 7 |
|-----------|---------|---------|---------|---------|---------|---------|---------|
| Nuclear   | 24      | 30      | 37      | 36      | 38      | 41      | 33      |
| Both      | 32      | 24      | 23      | 28      | 19      | 32      | 44      |
| Cytoplasm | 16      | 28      | 30      | 22      | 21      | 28      | 32      |

**SCH23390**

|           | Image 1 | Image 2 |
|-----------|---------|---------|
| Nuclear   | 110     | 90      |
| Both      | 2       | 5       |
| Cytoplasm | 4       | 4       |

Data for Fig 3G

HDAC-GFP-PKD1 loxp/loxP

DMSO

Total number of cell

|           | Image 1 | Image 2 | Image 3 | Image 4 | Image 5 |
|-----------|---------|---------|---------|---------|---------|
| Nuclear   | 104     | 90      | 111     | 81      | 124     |
| Both      | 20      | 17      | 6       | 7       | 8       |
| Cytoplasm | 3       | 7       | 10      | 0       | 4       |

Oka 1 $\mu$ M

|         | Image 1 | Image 2 | Image 3 |
|---------|---------|---------|---------|
| Nuclear | 2       | 0       | 0       |
| Both    | 1       | 0       | 10      |
| Cyto    | 110     | 105     | 130     |

Tautomycetin 5 $\mu$ M

|         | Image 1 | Image 2 |
|---------|---------|---------|
| Nuclear | 101     | 109     |
| Both    | 0       | 0       |
| Cyto    | 5       | 6       |

H-89 50 $\mu$ M

|         | Image 1 | Image 2 | Image 3 |
|---------|---------|---------|---------|
| Nuclear | 12      | 18      | 19      |
| Both    | 2       | 7       | 9       |
| Cyto    | 110     | 71      | 90      |

Oka 100nM washout DMSO

|         | Image 1 | Image 2 | Image 3 |
|---------|---------|---------|---------|
| Nuclear | 90      | 100     | 120     |
| Both    | 10      | 2       | 2       |
| Cyto    | 0       | 2       | 14      |

Oka 100nM washout H-89 30 $\mu$ M

|         | Image 1 | Image 2 | Image 3 |
|---------|---------|---------|---------|
| Nuclear | 2       | 2       | 7       |
| Both    | 0       | 6       | 4       |
| Cyto    | 118     | 109     | 110     |

Fsk

|         | Image 1 | Image 2 | Image 3 |
|---------|---------|---------|---------|
| Nuclear | 140     | 99      | 132     |
| Both    | 0       | 0       | 1       |
| Cyto    | 1       | 0       | 4       |

Fsk+Oka 1 $\mu$ M

|         | Image 1 | Image 2 | Image 3 |
|---------|---------|---------|---------|
| Nuclear | 13      | 52      | 45      |
| Both    | 20      | 0       | 12      |
| Cyto    | 71      | 30      | 20      |

Fsk+Tautomycetin 5 $\mu$ M

|         | Image 1 | Image 2 |
|---------|---------|---------|
| Nuclear | 102     | 110     |
| Both    | 7       | 0       |
| Cyto    | 0       | 2       |

Fsk+H-89 50 $\mu$ M

|         | Image 1 | Image 2 | Image 3 |
|---------|---------|---------|---------|
| Nuclear | 140     | 80      | 95      |
| Both    | 0       | 0       | 1       |
| Cyto    | 2       | 0       | 0       |

Domperidone

|         | Image 1 | Image 2 | Image 3 | Image 4 | Image 5 |
|---------|---------|---------|---------|---------|---------|
| Nuclear | 10      | 12      | 5       | 2       | 6       |
| Both    | 21      | 34      | 30      | 22      | 43      |
| Cyto    | 64      | 54      | 67      | 75      | 80      |

50 $\mu$ M GO6983+Domperidone

|         | Image 1 | Image 2 |
|---------|---------|---------|
| Nuclear | 6       | 13      |
| Both    | 4       | 11      |
| Cyto    | 110     | 95      |

PKD1 null transiently transfected with HDAC5-GFP

DMSO

|           | Image 1 | Image 2 | Image 3 | Image 4 |
|-----------|---------|---------|---------|---------|
| Nuclear   | 98      | 122     | 109     | 120     |
| Cytoplasm | 4       | 8       | 12      | 7       |

Oka 1 $\mu$ M

|           | Image 1 | Image 2 |
|-----------|---------|---------|
| Nuclear   | 40      | 36      |
| Cytoplasm | 70      | 80      |

Tautomycetin 5 $\mu$ m

|           | Image 1 | Image 2 | Image 3 |
|-----------|---------|---------|---------|
| Nuclear   | 79      | 100     | 125     |
| Cytoplasm | 2       | 9       | 12      |

Data for Fig 4C

DMSO

Normalized % cystic area

|             |             |
|-------------|-------------|
| 0.719665032 | 1.08274781  |
| 1.048543279 | 1.149043879 |
| 1.412023751 | 1.004401425 |
| 0.775745773 | 0.807829051 |
| 0.894532003 |             |
| 1.172379239 | 0.933088758 |
| 1.241971    | 0.758029    |

Domperidone

Normalized cyst area

|             |             |
|-------------|-------------|
| 0.27454192  | 0.340603786 |
| 0.771160953 | 0.79208397  |
| 0.724396359 | 0.604770903 |
|             | 0.457404195 |
| 0.734092869 | 0.842410023 |
| 0.687117199 | 0.637076204 |
| 0.772500001 | 0.60694026  |
| 1.241971416 |             |

Data for Fig 4F

DMSO

Normalized fraction of Ki67 nuclei

|             |
|-------------|
| 1.128997761 |
| 0.871002239 |
| 0.760924687 |
| 1.239075313 |
| 1.167746657 |
| 0.832253343 |
| 1           |
| 1           |

Domperidone

Normalized fraction of Ki67 nuclei

|             |
|-------------|
| 0.638772328 |
| 0.91497046  |
| 1.017544133 |
| 0.973928436 |
| 0.766377031 |
| 0.180382056 |
| 0.438250141 |
| 0.897066014 |

0.509678838

Data for Fig 5C

DMSO

Normalized % cystic area

|             |
|-------------|
| 0.985649835 |
| 1.033451161 |
| 1.021706492 |
| 0.959192512 |

Domperidone

Normalized % cystic area

|             |
|-------------|
| 0.696379704 |
| 0.645533752 |



Data for S1C Fig

Pkd1-/-HDAC5+/+

Normalized % cystic area

|             |          |
|-------------|----------|
| 0.89368111  | 1.106319 |
| 0.921257764 | 1.078742 |
| 1.023967894 | 0.994305 |
| 0.981727503 |          |

Pkd1-/-HDAC5+/-

Normalized % cystic area

|             |          |
|-------------|----------|
| 0.43706151  | 0.542078 |
| 0.721545792 | 0.577819 |
| 1.015624448 | 1.278841 |
| 0.50560219  | 0.829788 |
| 0.665140407 | 0.538029 |
| 0.648682542 | 0.813311 |
| 0.939999313 | 0.864131 |
| 0.214958616 | 0.130897 |
| 0.266063837 | 0.281869 |
| 0.177668229 | 0.107571 |
| 0.137102521 | 0.144013 |

Data for S1D Fig

Pkd1-/-HDAC5+/+ P21

Normalized BUN

|             |
|-------------|
| 1.816729992 |
| 0.546603231 |
| 0.636666777 |

Pkd1-/-HDAC5+/- P21

Normalized BUN

|             |
|-------------|
| 1.372887826 |
| 1.799517514 |
| 0.591475562 |
| 0.886656721 |
| 0.545892022 |
| 1.304420799 |
| 0.647081004 |
| 0.448122636 |
| 0.68718355  |
| 1.139347528 |

Pkd1-/-HDAC5+/+ P28

Normalized BUN

|             |
|-------------|
| 0.924243438 |
|-------------|

|             |
|-------------|
| 0.836483525 |
| 0.958527846 |
| 1.098932149 |

Pkd1-/-HDAC5+/- P28

Normalized BUN

|             |
|-------------|
| 0.744296549 |
| 0.660978358 |
| 0.770085526 |

Data for S2C Fig & S2D Fig

Antagonist or agonist in positive hits

|                                | Fraction nuclear | SEM   |
|--------------------------------|------------------|-------|
| DMSO                           | 0.456            | 0.002 |
| I3A                            | 0.240            | 0.004 |
| PMA                            | 0.209            | 0.004 |
| Cisapride                      | 0.240            | 0.023 |
| Loxapine succinate             | 0.270            | 0.036 |
| Oxybutynin chloride            | 0.277            | 0.017 |
| Cyproheptadine hydrochloride   | 0.278            | 0.026 |
| Domperidone                    | 0.281            | 0.041 |
| Pimozide                       | 0.309            | 0.015 |
| Pizotifen malate               | 0.315            | 0.022 |
| Pimethixene maleate            | 0.323            | 0.032 |
| Tridihexethyl chloride         | 0.333            | 0.013 |
| Deptropine citrate             | 0.338            | 0.040 |
| Amitryptiline hydrochloride    | 0.346            | 0.023 |
| Diphemanil methylsulfate       | 0.353            | 0.012 |
| Clebopride maleate             | 0.355            | 0.024 |
| Tetrahydrozoline hydrochloride | 0.357            | 0.022 |
| Beta-Escin                     | 0.359            | 0.027 |
| Methyldopate hydrochloride     | 0.359            | 0.027 |
| Lofexidine                     | 0.360            | 0.025 |
| Flunisolide                    | 0.363            | 0.016 |
| Tizanidine                     | 0.333            | 0.012 |

Antagonist or agonist in negative hits

|                                                | Fraction nuclear | SEM   |
|------------------------------------------------|------------------|-------|
| DMSO                                           | 0.456            | 0.002 |
| I3A                                            | 0.240            | 0.004 |
| PMA                                            | 0.209            | 0.004 |
| (+)-Isoproterenol (+)-bitartrate salt          | 0.550            | 0.038 |
| Alprostadil                                    | 0.553            | 0.035 |
| Ritodrine hydrochloride                        | 0.553            | 0.029 |
| Pridinol methanesulfonate salt                 | 0.556            | 0.030 |
| Fenoterol hydrobromide                         | 0.559            | 0.039 |
| Nylidrin                                       | 0.566            | 0.026 |
| Levonordefrin                                  | 0.569            | 0.008 |
| Metaproterenol sulfate □ orciprenaline sulfate | 0.569            | 0.034 |
| Salbutamol                                     | 0.577            | 0.008 |
| Dipivefrin hydrochloride                       | 0.586            | 0.012 |
| Tulobuterol                                    | 0.599            | 0.022 |
| Terbutaline hemisulfate                        | 0.610            | 0.023 |
| Racepinephrine HCl                             | 0.616            | 0.013 |
| Formoterol fumarate                            | 0.617            | 0.018 |
| Levonordefrin                                  | 0.536            | 0.016 |
| Fenoterol hydrobromide                         | 0.543            | 0.020 |
| Salbutamol                                     | 0.570            | 0.014 |
| Isoetharine mesylate salt                      | 0.577            | 0.022 |
| Racepinephrine HCl                             | 0.595            | 0.027 |

|                               |       |       |
|-------------------------------|-------|-------|
| Prazosin hydrochloride        | 0.339 | 0.022 |
| Quipazine dimaleate salt      | 0.342 | 0.034 |
| Atropine sulfate monohydrate  | 0.343 | 0.020 |
| (S)-(-)-Atenolol              | 0.347 | 0.021 |
| Amiodarone hydrochloride      | 0.349 | 0.021 |
| Buflomedil hydrochloride      | 0.353 | 0.024 |
| SR-95639A dihydrochloride     | 0.354 | 0.012 |
| Raclopride                    | 0.355 | 0.019 |
| Chlorprothixene hydrochloride | 0.356 | 0.012 |

Data for S3C Fig

HDAC-GFP-PKD1 loxp/loxP

**DMSO**

Total number of cell

|           | Image 1 | Image 2 | Image 3 | Image 4 | Image 5 |
|-----------|---------|---------|---------|---------|---------|
| Nuclear   | 104     | 90      | 111     | 81      | 124     |
| Both      | 20      | 17      | 6       | 7       | 8       |
| Cytoplasm | 3       | 7       | 10      | 0       | 4       |

**Flow-DMSO**

|           | Image 1 | Image 2 | Image 3 | Image 4 | Image 5 | Image 6 |
|-----------|---------|---------|---------|---------|---------|---------|
| Nuclear   | 37      | 15      | 14      | 9       | 17      | 8       |
| Both      | 136     | 140     | 59      | 82      | 84      | 50      |
| Cytoplasm | 44      | 66      | 31      | 18      | 12      | 18      |

**Flow-terbutaline**

|           | Image 1 | Image 2 | Image 3 |
|-----------|---------|---------|---------|
| Nuclear   | 62      | 58      | 77      |
| Both      | 1       | 3       | 12      |
| Cytoplasm | 2       | 5       | 10      |

**PMA-DMSO**

|           | Image 1 | Image 2 |
|-----------|---------|---------|
| Nuclear   | 1       | 1       |
| Both      | 24      | 25      |
| Cytoplasm | 125     | 98      |

**PMA-Terbutaline**

|           | Image 1 | Image 2 | Image 3 |
|-----------|---------|---------|---------|
| Nuclear   | 25      | 44      | 54      |
| Both      | 22      | 17      | 20      |
| Cytoplasm | 10      | 14      | 21      |

PKD1 loxp/loxP transiently transfected with HDAC5-GFP

**DMSO**

|           | Image 1 | Image 2 |
|-----------|---------|---------|
| Nuclear   | 13      | 12      |
| Both      | 2       | 1       |
| Cytoplasm | 0       | 1       |

**Domperidone**

|         | Image 1 | Image 2 | Image 3 | Image 4 |
|---------|---------|---------|---------|---------|
| Nuclear | 1       | 1       | 1       | 1       |
| Both    | 2       | 7       | 0       | 1       |

|           |   |    |   |    |
|-----------|---|----|---|----|
| Cytoplasm | 3 | 12 | 4 | 15 |
|-----------|---|----|---|----|

Data for S3C Fig

Kif3a<sup>-/-</sup> transiently transfected with HDAC5-GFP

**DMSO** Total number of cell

|           | Image 1 | Image 2 | Image 3 |
|-----------|---------|---------|---------|
| Nuclear   | 96      | 70      | 80      |
| Cytoplasm | 11      | 5       | 11      |

**Domperidone**

|           | Image 1 | Image 2 | Image 3 |
|-----------|---------|---------|---------|
| Nuclear   | 14      | 5       | 2       |
| Cytoplasm | 112     | 90      | 100     |

**Loxapine**

|           | Image 1 | Image 2 | Image 3 |
|-----------|---------|---------|---------|
| Nuclear   | 10      | 1       | 5       |
| Cytoplasm | 120     | 110     | 81      |

HDAC-GFP-PKD1 loxp/loxP

**Raclopride 10nM**

|           | Image 1 | Image 2 | Image 3 | Image 4 |
|-----------|---------|---------|---------|---------|
| Nuclear   | 53      | 50      | 35      | 38      |
| Both      | 33      | 33      | 27      | 31      |
| Cytoplasm | 27      | 50      | 16      | 19      |

## Data for S3 Table

| Genotype  | Treatment   | % Glomerular cyst | Body Weight (gm) | Kidney Weight (mg) |    |
|-----------|-------------|-------------------|------------------|--------------------|----|
| WT        | DMSO        | Not calculated    | 14               | 17                 | 15 |
| WT        | DMSO        | Not calculated    | 22               | 18                 | 17 |
| WT        | Domperidone | 0                 | 17               | 16                 | 16 |
| Pkd1 null | DMSO        | 68                | 8                | 41                 | 39 |
| Pkd1 null | DMSO        | 64                | 8                | 75                 | 57 |
| Pkd1 null | Domperidone | 0                 | 20               | 39                 | 36 |
| Pkd1 null | Domperidone | 59                | 13               | 87                 | 91 |
| Pkd1 null | Domperidone | 4                 | 16               | 75                 | 87 |
